# Supplementary material
Source: PubMed Central journal article supplement (PMC8657352)
Supplement: JGS-70-8-s001.pdf [file JGS-70-8-s001.pdf]

## Supplementary Materials S1 – Survey Distributed to National Association of Health Care Assistants (NAHCA) Membership

*Text highlighted in yellow should not be translated. This is needed for programming and is not displayed in the web survey.*

*Question numbers will not display to respondents (because there are skip patterns).*

*Page break between each question so easier to complete on mobile device.*

*Show progress bar at top of page.*

*Allow Save and Back buttons.*

*No questions are required except for Q1 (18yo), which confirms that the respondent is at least 18 years old.*

**title.**

### Staff Perspectives on COVID-19 Testing and Vaccines

**intro.**

The purpose of this survey is to get input from **front-line long-term care staff** about COVID-19 testing and vaccines in order to develop appropriate educational materials and resources.

**Your responses are confidential.** Findings will be reported in aggregate only to understand what kinds of resources are needed for staff working in long-term care. The survey is completely voluntary, and you may skip questions you do not feel comfortable answering.

**This survey takes approximately 7-10 minutes to complete**, and we ask that you complete it by Friday, January 15, 2021. You must be 18 years old or older to participate.

You can save the survey and continue where you left off as long as your browser is the same and cookies are enabled.

The survey is led by researchers at Brown University. If you have questions or concerns, please contact Faye Dvorchak, Project Director, at [faye\\_dvorchak@brown.edu](mailto:faye_dvorchak@brown.edu) or 401-863-2486.

Thank you for taking the time to participate.

**18yo. [REQUIRED]**

1. Are you at least 18 years old?
  - (0) No → **[SKIP TO TERMINATE THE SURVEY]**: Thank you for your interest, but you must be 18 years old or older to participate in the survey.
  - (1) Yes

**hdr1.**

## COVID-19 Knowledge and Perceptions

**close.**

|                                              | No<br>(0)             | Yes<br>(1)            |
|----------------------------------------------|-----------------------|-----------------------|
| 2. Has anyone close to you:                  |                       |                       |
| <b>sick.</b> Become sick from COVID-19?      | <input type="radio"/> | <input type="radio"/> |
| <b>hosp.</b> Been hospitalized for COVID-19? | <input type="radio"/> | <input type="radio"/> |
| <b>died.</b> Died from COVID-19?             | <input type="radio"/> | <input type="radio"/> |

**youcov.**

3. Have **you** had COVID-19?
- (0) No
  - (1) Yes
  - (777) I don't know
  - (999) Prefer not to answer

**risk.** [ONLY SHOW IF youcov ≠ Yes]

4. What do you think **your** personal level of risk is for getting sick from COVID-19?
- (1) Low risk
  - (2) Medium risk
  - (3) High risk

**hdr2.**

### COVID-19 Testing

**These questions ask about your perspectives on COVID-19 testing.**

**tst30d.**

5. Have you been tested for COVID-19 in the last 30 days?
- (0) No
  - (1) Yes

**whyst.** [ONLY SHOW IF tst30d = Yes]

6. Why were you tested? (Select the **primary** reason for your **latest test**.)
- (1) Required for work
  - (2) I had symptoms
  - (3) I had contact with someone who tested positive or was sick
  - (4) I had no symptoms, but wanted to know if I was infected
  - (888) Other, specify: \_\_\_\_\_ [single line]

**bartst.**

7. Have you encountered any of the following barriers or problems with testing? (**Select all that apply.**)
- (1) Need to take time off work to get tested
  - (2) Out of pocket costs for test
  - (3) Out of pocket costs for transportation, childcare, or time off work to get tested
  - (4) I do not know where to go to be tested
  - (5) Pain or discomfort from the test
  - (6) Concern about others handling my personal data
  - (888) Other, specify: \_\_\_\_\_ [single line]

- (0) None of the above [mutually exclusive]

**paidtim.**

8. Does your employer offer **paid** time off if you test positive?
- (0) No
- (1) Yes
- (888) Other, specify: \_\_\_\_\_ [single line]
- (999) Prefer not to answer

**insure.**

9. Do you currently have health insurance?
- (0) No
- (1) Yes
- (888) Other, specify: \_\_\_\_\_ [single line]
- (999) Prefer not to answer

**isolate.**

10. If you needed to isolate due to a positive test or illness, what challenges do you face? (**Select all that apply.**)
- (1) There are other people in my household
- (2) There are children in my household
- (3) There are older adults in my household
- (4) I don't have a good place where I could isolate
- (5) No one to help me if I am sick
- (6) Lost income or wages
- (7) People might blame me or treat me badly
- (888) Other, specify: \_\_\_\_\_ [single line]
- (0) None of the above [mutually exclusive]

**hdr3.**

**COVID-19 Vaccine**

**These questions ask about your perspectives on COVID-19 vaccines.**

**fluvac.**

11. Did you get a flu vaccine in the last 12 months?
- (0) No
- (1) Yes

**vacc1. (Matrix question with 1-4 grid sliders; hide number values)**

12. In deciding whether to get the COVID-19 vaccine, how important is each of these to you?
- (1) **Not important** ← → (4) **Very important**
- The vaccine is safe
  - The vaccine is effective
  - The vaccine is free or low cost
  - The vaccine is not painful
  - Convenience in where and when I can get it

**vacc2. (Matrix question with 1-4 grid sliders; hide number values)**

13. In deciding whether to get the COVID-19 vaccine, how important is each of these to you?

(1) Not important ← → (4) Very important

- My healthcare provider recommends it
- People I trust recommend it
- Seeing public figures get vaccinated
- Seeing my co-workers get vaccinated
- Getting paid time off if I have a reaction to the vaccine

**ownwds.**

14. Briefly, in your own words, what would it take for you get the COVID-19 vaccine?

\_\_\_\_\_ [multiline]

**consaf.** (Slider question with 1-4 grid; hide number values)

15. Based on what you know so far, how confident are you that the COVID-19 vaccines are **safe**?

(1) Not confident ← → (4) Very confident

**coneff.** (Slider question with 1-4 grid; hide number values)

16. Based on what you know so far, how confident are you that the COVID-19 vaccines are **effective** at preventing people from getting sick?

(1) Not confident ← → (4) Very confident

**conpoc.** (Matrix question with 1-4 grid; hide number values)

17. Based on what you know so far, how confident are you that the COVID-19 vaccines have been adequately tested for safety and effectiveness **specifically among people of color**?

(1) Not confident ← → (4) Very confident

**hdr4.**

## Communication Preferences

**These questions ask about how you receive information about COVID-19.**

**trust.**

18. Who do you trust to give you accurate information about COVID-19? (**Select all that apply.**)

- (1) Federal government
- (2) State or local government
- (3) National news organizations
- (4) Local news organizations
- (5) Employer
- (6) Co-workers
- (7) Friends or family

- (8) Church/pastor
- (9) My doctor or healthcare provider
- (10) Medical websites like Mayo Clinic or WebMD
- (888) Other, specify: \_\_\_\_\_ [single line]
- (0) None of the above [mutually exclusive]

**prefer.**

19. How do you prefer to receive information about COVID-19? (**Select all that apply**).

- (1) TV news
- (2) Newspapers (online or print)
- (3) Websites
- (4) Facebook
- (5) YouTube
- (6) Twitter
- (7) Other social media, specify: \_\_\_\_\_ [single line]
- (8) Smartphone app
- (9) Email
- (10) Text messages
- (11) Paper brochures or handouts
- (12) In-person education
- (13) Phone call or video chat
- (888) Other, specify: \_\_\_\_\_ [single line]
- (0) None of the above [mutually exclusive]

**hdr5.**

**About You.**

**These questions ask about you and your employer.**

**state.**

20. In which state is your employer located?

[Drop-down with 50 states, D.C. and Puerto Rico]

**age.**

21. What is your age?

- (1) 18-24 years old
- (2) 25-34 years old
- (3) 35-44 years old
- (4) 45-54 years old
- (5) 55-64 years old
- (6) 65-74 years old
- (7) 75-84 years old
- (8) 85 years old or older
- (999) Prefer not to answer

**ethnic.**

22. Are you of Hispanic, Latino, or Spanish origin?

- (0) No
- (1) Yes
- (999) Prefer not to answer

**race.**

23. Which of these groups would you say best represents your race? (**Select all that apply.**)

- (1) American Indian or Alaskan Native
- (2) Asian or Asian American
- (3) Black or African American
- (4) Native Hawaiian or Other Pacific Islander
- (5) White
- (888) Other, specify: \_\_\_\_\_ [single line]
- (999) Prefer not to answer [mutually exclusive]

**jobcat.**

24. Which of the following **best** describes your current job category?

- (1) CNA or HHA
- (2) CMT or CMA
- (3) LPN
- (4) RN
- (5) Physician
- (6) Nurse practitioner or physician assistant
- (7) Pharmacist
- (8) Social worker
- (9) Rehab therapist (PT, OT, ST)
- (10) Rehab assistant
- (11) Dietary or food services
- (12) Environmental services or housekeeping
- (13) Maintenance
- (14) Administrator
- (888) Other, specify: \_\_\_\_\_ [single line]

**jobset.**

25. Which of these settings best describes your **primary job** (where you work the most hours)?

- (1) Nursing home
- (2) Assisted living community
- (3) Continuing care retirement community
- (4) Group home
- (5) Home care
- (6) VA or Veterans Home
- (7) Hospital
- (888) Other, specify: \_\_\_\_\_ [single line]

**job1yr.**

26. Do you plan to be with your current employer **one year from now**?

- (0) No
- (1) Yes

(777) I don't know

**orgldr. [ONLY SHOW IF jobcat is any of: (1) CNA or HHA; (2) CMT or CMA; (3) LPN; or (4) RN]**

| 27. This question asks about organizational leadership at your <b>primary job</b> (where you work the most hours). Please indicate the degree to which the following are present in your work setting: | <b>Strongly disagree</b><br>(1) | <b>Somewhat disagree</b><br>(2) | <b>Somewhat agree</b><br>(3) | <b>Strongly agree</b><br>(4) |
|--------------------------------------------------------------------------------------------------------------------------------------------------------------------------------------------------------|---------------------------------|---------------------------------|------------------------------|------------------------------|
| <b>donmgr.</b> A director of nursing who is a good manager and leader                                                                                                                                  | <input type="radio"/>           | <input type="radio"/>           | <input type="radio"/>        | <input type="radio"/>        |
| <b>dondec.</b> A director of nursing or supervisor who backs up the direct care staff in decision making                                                                                               | <input type="radio"/>           | <input type="radio"/>           | <input type="radio"/>        | <input type="radio"/>        |
| <b>suplrm.</b> Supervisors use mistakes as learning opportunities, not criticism                                                                                                                       | <input type="radio"/>           | <input type="radio"/>           | <input type="radio"/>        | <input type="radio"/>        |
| <b>supdir.</b> Supervisors are supportive of the direct care staff                                                                                                                                     | <input type="radio"/>           | <input type="radio"/>           | <input type="radio"/>        | <input type="radio"/>        |
| <b>praise.</b> Praise and recognition for a job well done                                                                                                                                              | <input type="radio"/>           | <input type="radio"/>           | <input type="radio"/>        | <input type="radio"/>        |

**end.**

This is the end of the survey. Please click  below to submit your responses.

Thank you!

**Supplementary Materials 2**

**Table S1. Respondent Perceptions of COVID-19 Vaccines by Race**

**Table S2. Respondent Perceptions of COVID-19 Vaccines by Ethnicity**

**Table S3. Overall Information and Communication Preferences**

**Table S4. Confidence in COVID-19 Vaccines by Key Strata (all completed responses)**



**Table S1. Respondent Perceptions of COVID-19 Vaccines by Race**

| <b>Decision-making to get the vaccine</b><br><i>In deciding to get the COVID-19 vaccine, how important is each of these to you?</i> | <b>At least moderately important<br/>                     (% rating ≥ 3)</b> |              |              |                |
|-------------------------------------------------------------------------------------------------------------------------------------|------------------------------------------------------------------------------|--------------|--------------|----------------|
| <b>By Race</b>                                                                                                                      | <b>White</b>                                                                 | <b>Black</b> | <b>Other</b> | <b>p-value</b> |
| The vaccine is safe                                                                                                                 | 93.9                                                                         | 81.1         | 94.7         | 0.055          |
| The vaccine is effective                                                                                                            | 91.9                                                                         | 78.4         | 94.7         | 0.056          |
| Getting paid time off if I have a reaction to the vaccine                                                                           | 88.9                                                                         | 70.3         | 84.2         | 0.032*         |
| The vaccine is free or low cost                                                                                                     | 74.7                                                                         | 75.7         | 73.7         | 0.986          |
| Convenience in where and when I can get it                                                                                          | 57.6                                                                         | 62.2         | 78.9         | 0.214          |
| My healthcare provider recommends it                                                                                                | 61.6                                                                         | 51.4         | 63.2         | 0.520          |
| People I trust recommend it                                                                                                         | 59.6                                                                         | 45.9         | 68.4         | 0.210          |
| Seeing my co-workers get vaccinated                                                                                                 | 40.4                                                                         | 37.8         | 52.6         | 0.543          |
| The vaccine is not painful                                                                                                          | 36.4                                                                         | 45.9         | 36.8         | 0.584          |
| Seeing public figures get vaccinated                                                                                                | 21.2                                                                         | 48.6         | 36.8         | 0.006*         |

**Table S2. Respondent Perceptions of COVID-19 Vaccines by Ethnicity**

| <b>Decision-making to get the vaccine</b><br><i>In deciding to get the COVID-19 vaccine, how important is each of these to you?</i> | <b>At least moderately important<br/>(% rating ≥ 3)</b> |                     |                |
|-------------------------------------------------------------------------------------------------------------------------------------|---------------------------------------------------------|---------------------|----------------|
| <b>By Ethnicity</b>                                                                                                                 | <b>Latino/a</b>                                         | <b>Non-Latino/a</b> | <b>p-value</b> |
| The vaccine is safe                                                                                                                 | 100.0                                                   | 90.1                | 0.235          |
| The vaccine is effective                                                                                                            | 100.0                                                   | 88.0                | 0.186          |
| Getting paid time off if I have a reaction to the vaccine                                                                           | 84.6                                                    | 83.8                | 0.939          |
| The vaccine is free or low cost                                                                                                     | 84.6                                                    | 73.9                | 0.396          |
| Convenience in where and when I can get it                                                                                          | 69.2                                                    | 60.6                | 0.539          |
| My healthcare provider recommends it                                                                                                | 84.6                                                    | 57.0                | 0.053          |
| People I trust recommend it                                                                                                         | 53.8                                                    | 57.7                | 0.786          |
| Seeing my co-workers get vaccinated                                                                                                 | 61.5                                                    | 39.4                | 0.121          |
| The vaccine is not painful                                                                                                          | 38.5                                                    | 38.7                | 0.985          |
| Seeing public figures get vaccinated                                                                                                | 15.4                                                    | 31.0                | 0.239          |

**Table S3. Overall Information and Communication Preferences (n=155)**

| <b>Who do you trust to give you accurate information about COVID-19*</b> | <b>% of respondents</b> |
|--------------------------------------------------------------------------|-------------------------|
| My doctor or healthcare provider                                         | 69.0%                   |
| State or local government                                                | 33.5%                   |
| Federal government                                                       | 31.0%                   |
| Employer                                                                 | 28.4%                   |
| Medical websites like Mayo Clinic or WebMD                               | 22.6%                   |
| National news organizations                                              | 18.7%                   |
| Friends or family                                                        | 18.1%                   |
| Co-workers                                                               | 16.1%                   |
| Local news organizations                                                 | 15.5%                   |
| Church/pastor                                                            | 6.5%                    |
| <b>How do you prefer to receive new information about COVID-19?*</b>     | <b>% of respondents</b> |
| TV news                                                                  | 40.6%                   |
| In-person education                                                      | 40.0%                   |
| Websites                                                                 | 39.4%                   |
| Email                                                                    | 36.8%                   |
| Paper brochures or handouts                                              | 24.5%                   |
| Newspapers (online or print)                                             | 21.3%                   |
| Text messages                                                            | 18.1%                   |
| Facebook                                                                 | 12.3%                   |
| Smartphone app                                                           | 11.0%                   |
| Phone call or video chat                                                 | 9.0%                    |
| YouTube                                                                  | 7.1%                    |
| Twitter                                                                  | 3.9%                    |
| Other social media                                                       | 2.6%                    |

*\*Respondents were asked to select all that apply*

**Table S4. Confidence in COVID-19 Vaccines by Key Strata (all completed responses)**

|                                     | <b>Confidence in COVID-19 Vaccines</b><br><i>Based on what you know so far, how confident are you that the COVID-19 vaccines are...</i><br>(% rating ≥ 3 - at least moderately confident) |                                                         |                                                                                           |
|-------------------------------------|-------------------------------------------------------------------------------------------------------------------------------------------------------------------------------------------|---------------------------------------------------------|-------------------------------------------------------------------------------------------|
|                                     | <b>Safe</b>                                                                                                                                                                               | <b>Effective at preventing people from getting sick</b> | <b>Adequately tested for safety and effectiveness specifically among people of color.</b> |
| <b>By Race</b>                      |                                                                                                                                                                                           |                                                         |                                                                                           |
| White                               | 36.2                                                                                                                                                                                      | 32.3                                                    | 32.2                                                                                      |
| Black                               | 24.5                                                                                                                                                                                      | 17.9                                                    | 21.6                                                                                      |
| Other                               | 35.5                                                                                                                                                                                      | 31.0                                                    | 12.2                                                                                      |
| p-value                             | 0.302                                                                                                                                                                                     | 0.130                                                   | 0.189                                                                                     |
| <b>By Ethnicity</b>                 |                                                                                                                                                                                           |                                                         |                                                                                           |
| Latino/a                            | 48.2                                                                                                                                                                                      | 37.0                                                    | 57.1                                                                                      |
| Non-Latino/a                        | 30.9                                                                                                                                                                                      | 27.9                                                    | 25.0                                                                                      |
| p-value                             | 0.074                                                                                                                                                                                     | 0.327                                                   | 0.002*                                                                                    |
| <b>By Job Setting</b>               |                                                                                                                                                                                           |                                                         |                                                                                           |
| Nursing Home/Hospital               | 31.2                                                                                                                                                                                      | 28.8                                                    | 28.6                                                                                      |
| AL/CCRC                             | 40.7                                                                                                                                                                                      | 29.6                                                    | 28.6                                                                                      |
| Home Care                           | 38.1                                                                                                                                                                                      | 36.8                                                    | 41.2                                                                                      |
| Other                               | 27.3                                                                                                                                                                                      | 23.8                                                    | 15.8                                                                                      |
| p-value                             | 0.675                                                                                                                                                                                     | 0.838                                                   | 0.415                                                                                     |
| <b>By Organizational Leadership</b> |                                                                                                                                                                                           |                                                         |                                                                                           |
| Poor                                | 26.9                                                                                                                                                                                      | 20.0                                                    | 23.3                                                                                      |
| Average                             | 28.3                                                                                                                                                                                      | 27.0                                                    | 25.5                                                                                      |
| Good                                | 46.3                                                                                                                                                                                      | 40.7                                                    | 39.6                                                                                      |
| p-value                             | 0.042*                                                                                                                                                                                    | 0.055                                                   | 0.140                                                                                     |
